# Supplementary material
Source: Springer Nature journal article supplement (https://www.springermedizin.de/resource/supplementary/13002_2008_134_MOESM13_ESM.pdf/9627306)

**Percentage of species  
found**

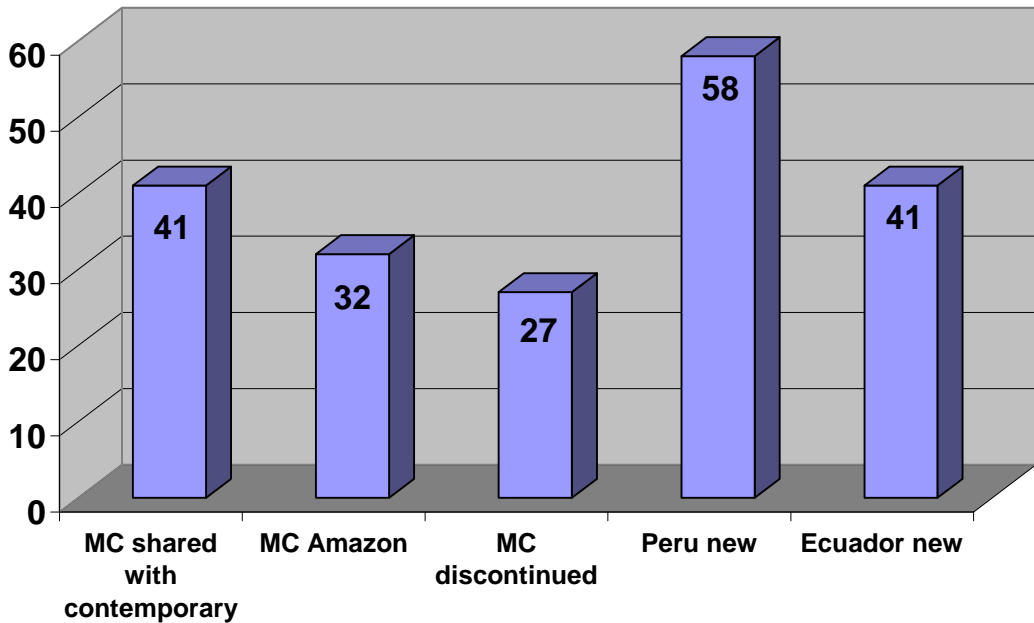

Supplement: MOESM13 [file 9627306]
